# Supplementary material for: TALEN-edited allogeneic inducible dual CAR T cells enable effective targeting of solid tumors while mitigating off-tumor toxicity
Source: PubMed Central journal article supplement — Mol Ther. 2024 Aug 21;32(11):3915–31. doi: 10.1016/j.ymthe.2024.08.018 (PMC11573618; doi:10.1016/j.ymthe.2024.08.018), 2024-08-21
Supplement: mmc1.pdf [file mmc1.pdf]

YMTHE, Volume 32

## **Supplemental Information**

**TALEN-edited allogeneic inducible dual CAR**

**T cells enable effective targeting of solid**

**tumors while mitigating off-tumor toxicity**

**Sonal Dharani, Hana Cho, Jorge Postigo Fernandez, Alexandre Juillerat, Julien Valton, Philippe Duchateau, Laurent Poirot, and Shipra Das**

Supplemental Material

Supplemental Figures

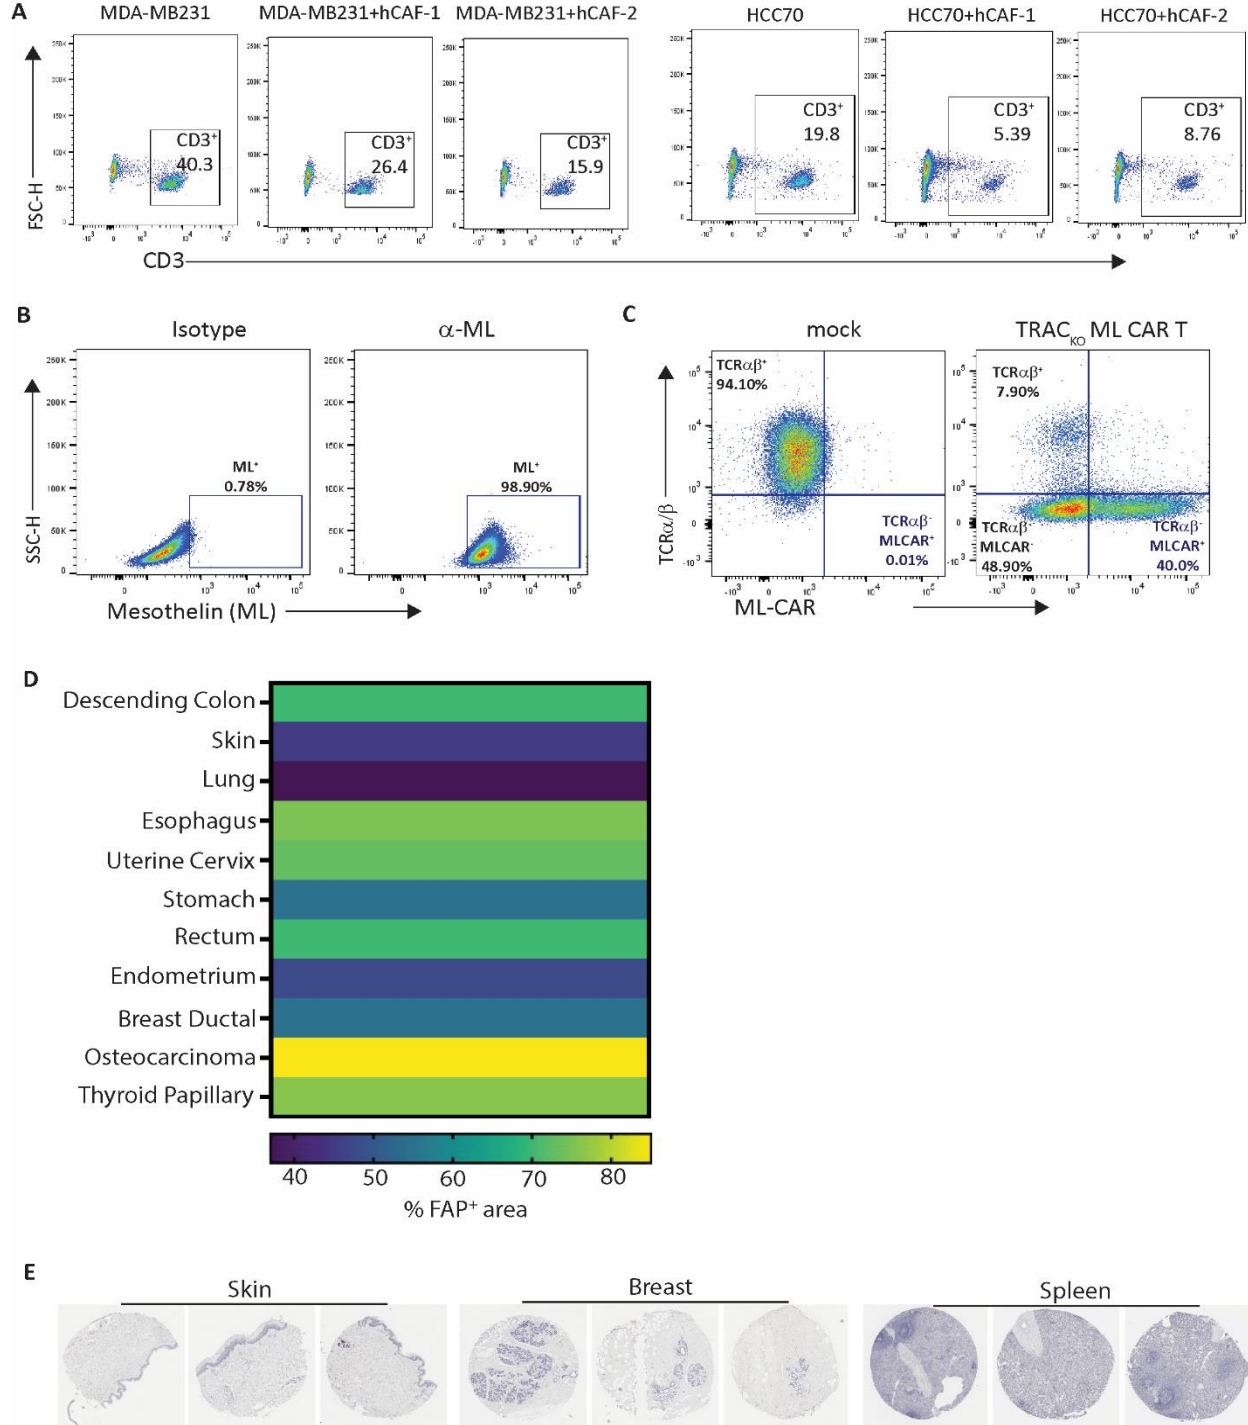

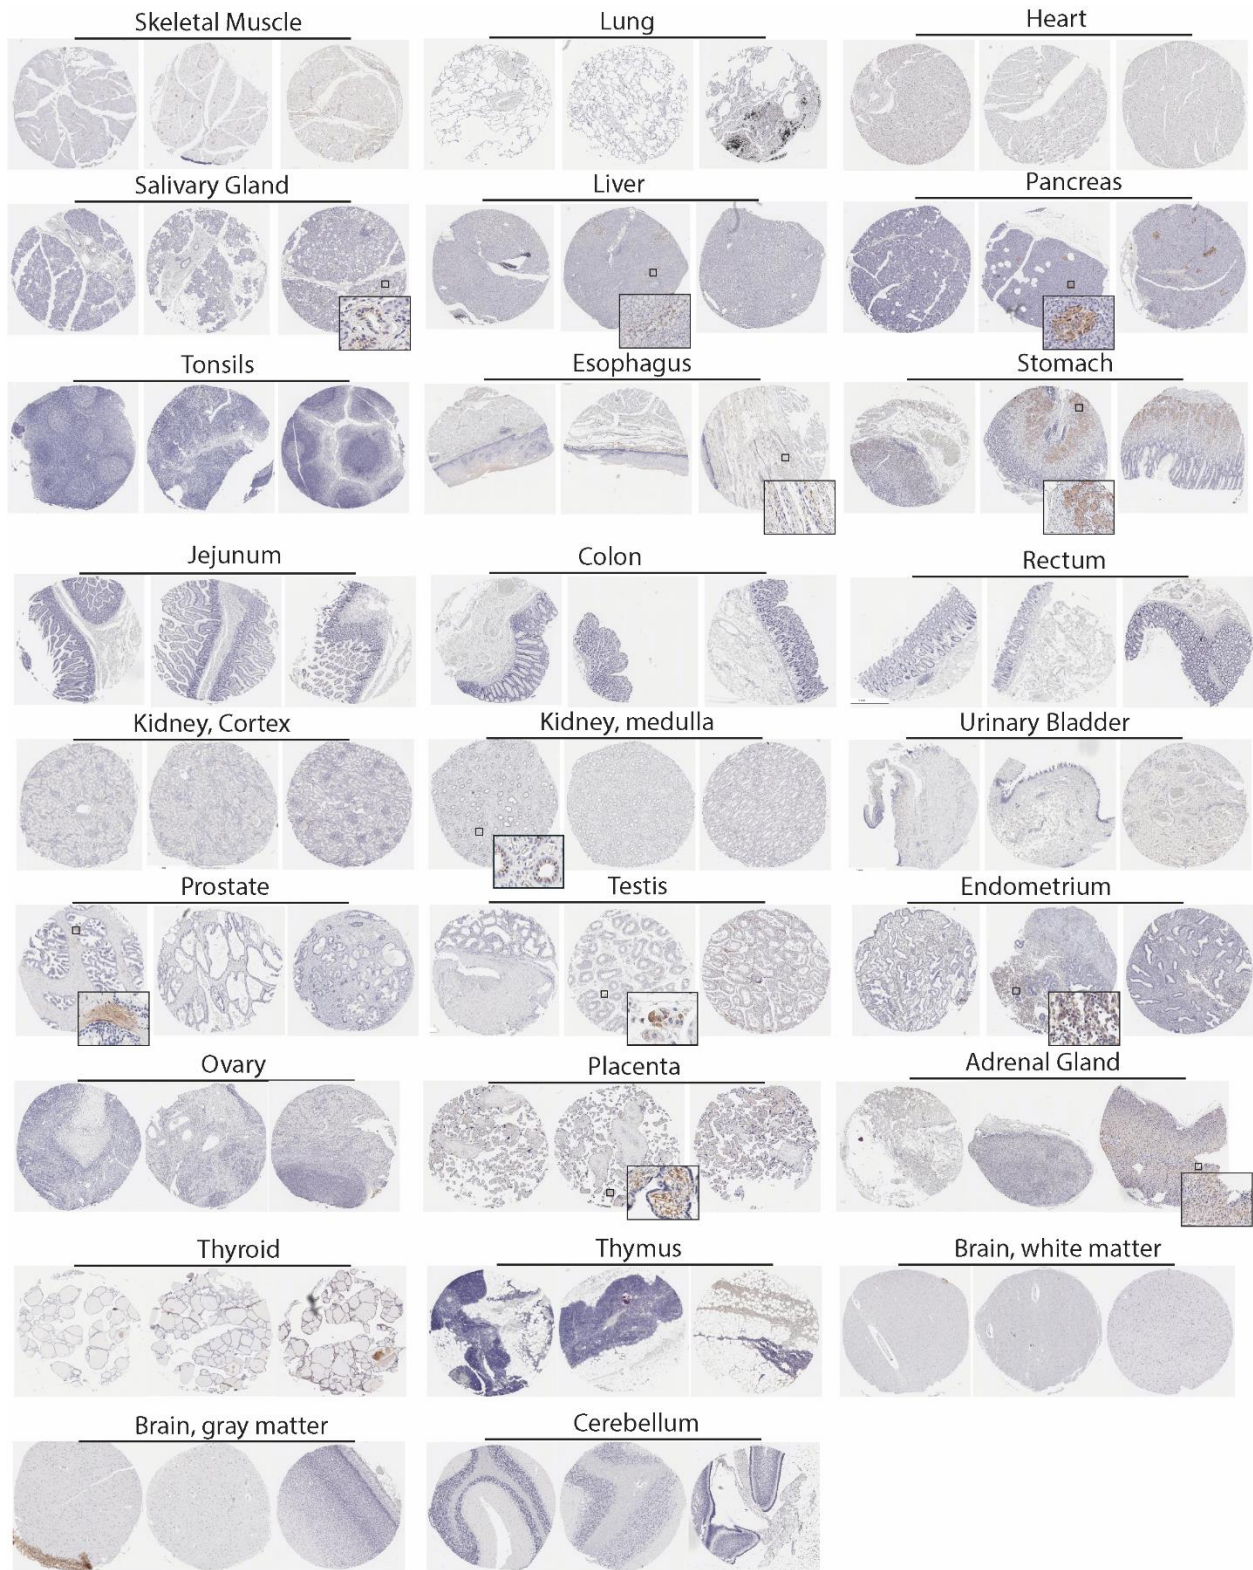

**Figure S1. FAP<sup>+</sup> CAFs are restricted to tumor microenvironment and inhibit intra-tumor T cell infiltration and CAR T-cell activity**

(A) Flow cytometry plots representing infiltrated T cells in spheroids of MDA-MB-231 and HCC70 tumor cells, either alone or co-cultured with TNBC patient-derived CAFs. (B) Analysis of Mesothelin (ML) expression on surface of MDA-MB-231-Luc tumor cells, as determined by flow cytometry. (C) Heatmap depicting percentage positive area stained for human FAP protein in immunohistochemical analysis of patient tumor tissue microarray, corresponding to **Figure 1E**. (D) Flow cytometry plot depicting ML CAR expression in mock transduced and TRAC<sub>KO</sub> MLCAR T-cells. (E) Immunohistochemical analysis of healthy donor tissue microarray for FAP protein detection. Inlays represent 40X magnification of positively stained area.

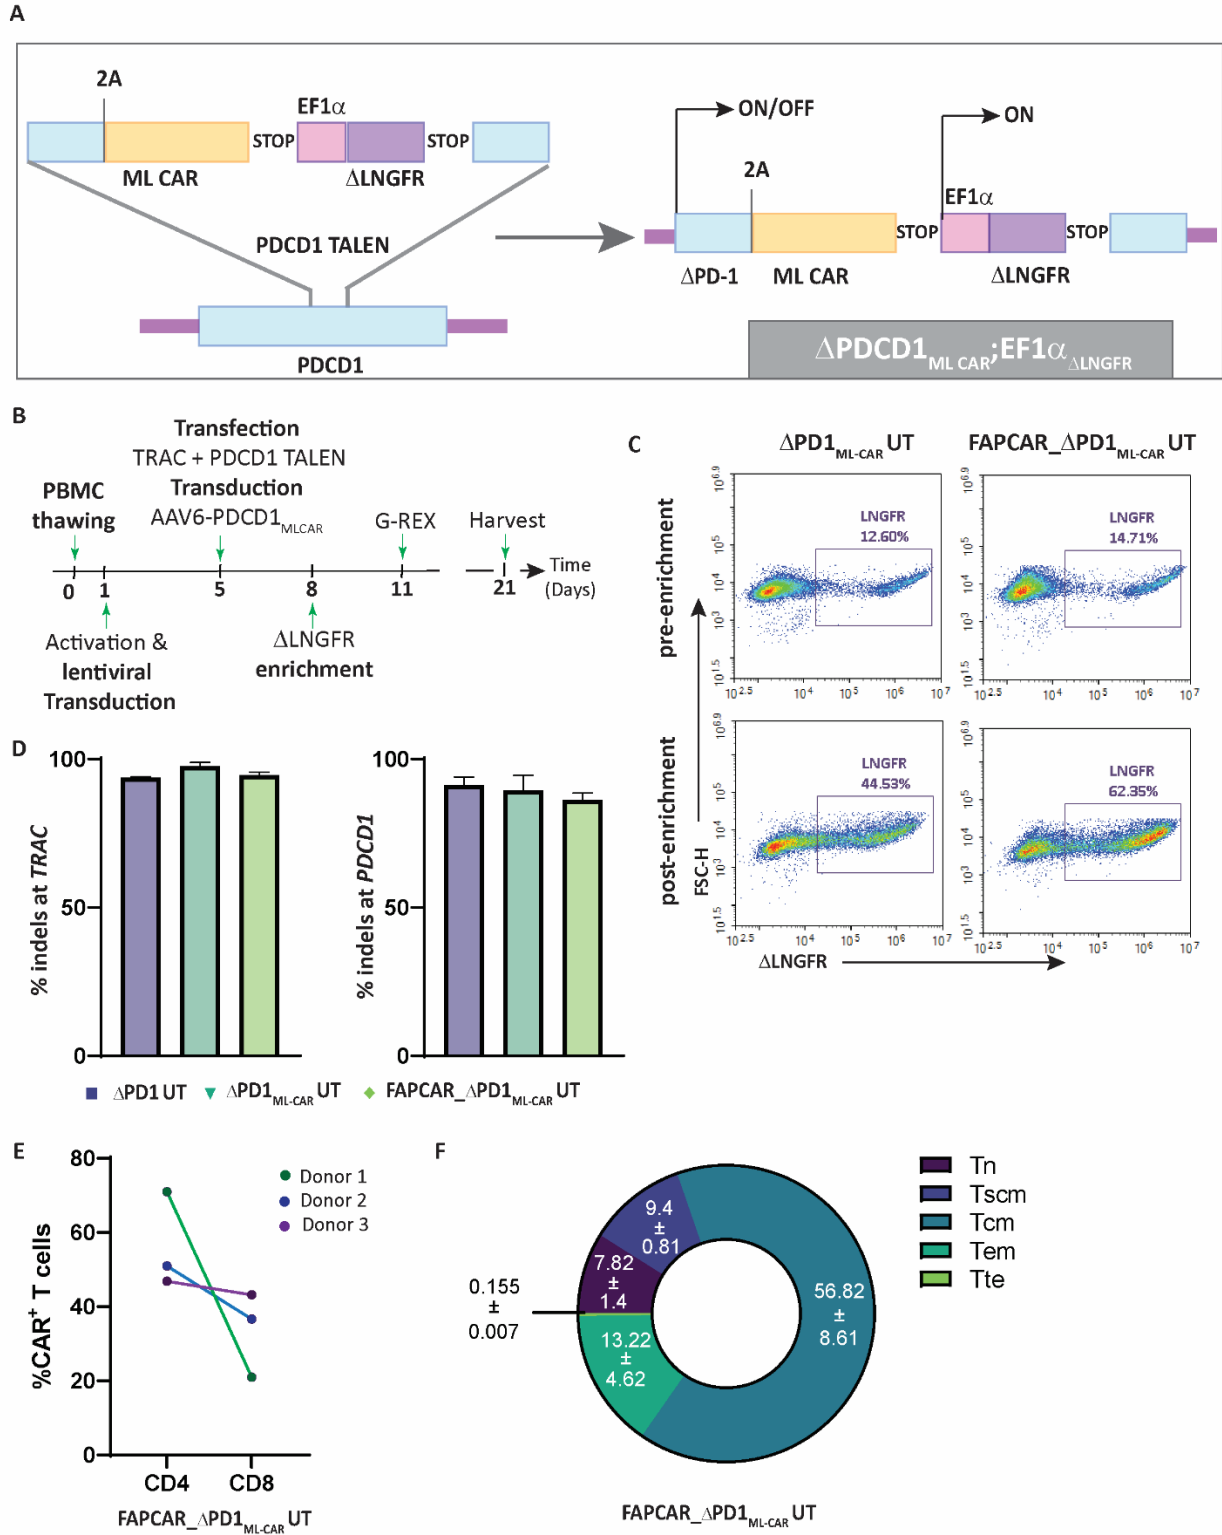

**Figure S2. Multiplex engineering of T cells using TALEN mediated gene editing and AAV6 DNA donor template integration**

(A) Schematic showing structure of the DNA repair matrix for disruptive insertion at *PDCD1*, consisting of ML CAR followed by *PDCD1* independent, EF1 $\alpha$  promoter-driven  $\Delta$ LNGFR transgene as marker for successful integration and subsequent enrichment. (B) Experimental strategy for TALEN-mediated gene editing, lentiviral and AAV6 transduction,  $\Delta$ LNGFR enrichment by MACS and expansion of engineered human universal CAR T-cells. (C) Flow cytometry plots depicting  $\Delta$ LNGFR expression pre- and post- enrichment of genetically modified UT cells. (D) Frequencies of insertions and deletions (indels) obtained by high-throughput DNA sequencing of TRAC (left) and *PDCD1* (right) TALEN cut-site, obtained from indicated engineered T-cells (n=2 donors). (E) Frequency of CD4<sup>+</sup> and CD8<sup>+</sup> cells gated on FAPCAR<sup>+</sup> subpopulation of FAPCAR\_ $\Delta$ PD1<sub>MLCAR</sub> UT-cells at end of engineered T cell expansion. Bars show the means  $\pm$  SD, n=3. (F) Frequency of CD62L<sup>+</sup>CD45RA<sup>+</sup>CD45RO<sup>-</sup> (T<sub>N</sub> naive), CD62L<sup>+</sup>CD45RA<sup>+</sup>CD45RO<sup>+</sup> (T<sub>SCM</sub> stem central memory), CD62L<sup>+</sup>CD45RA<sup>-</sup>CD45RO<sup>+</sup> (T<sub>CM</sub> central memory), CD62L<sup>-</sup>CD45RA<sup>-</sup>CD45RO<sup>+</sup> (T<sub>EM</sub> effector memory) and CD62L<sup>-</sup>CD45RA<sup>+</sup>CD45RO<sup>-</sup> (T<sub>TE</sub> terminal effector) gated on FAPCAR<sup>+</sup> subpopulation of FAPCAR\_ $\Delta$ PD1<sub>MLCAR</sub> UT-cells post engineering. Values indicate means  $\pm$  SD, n=2.

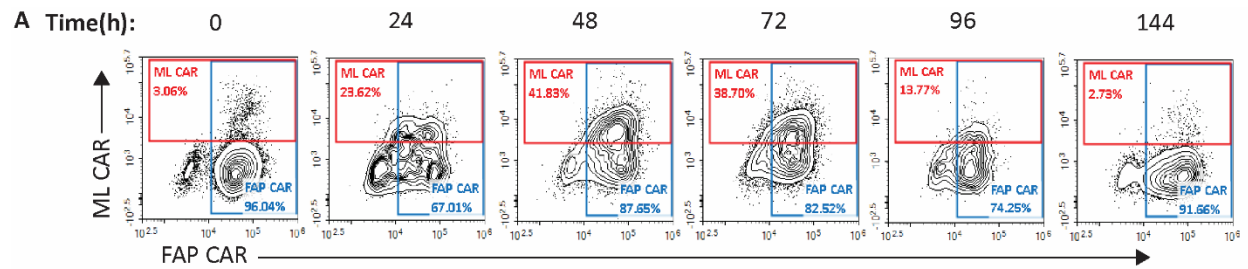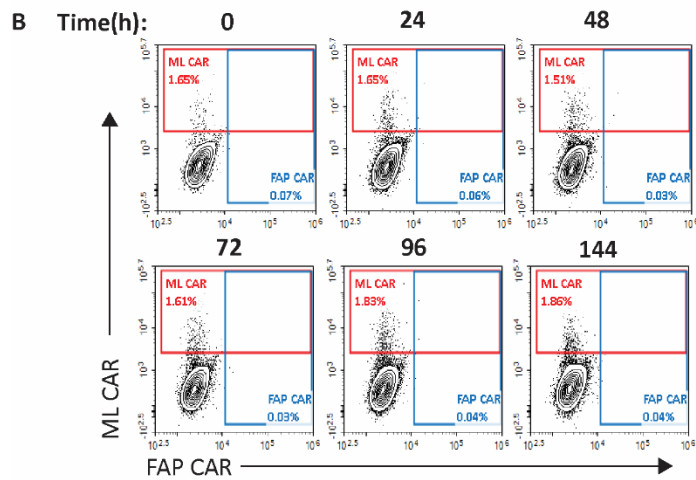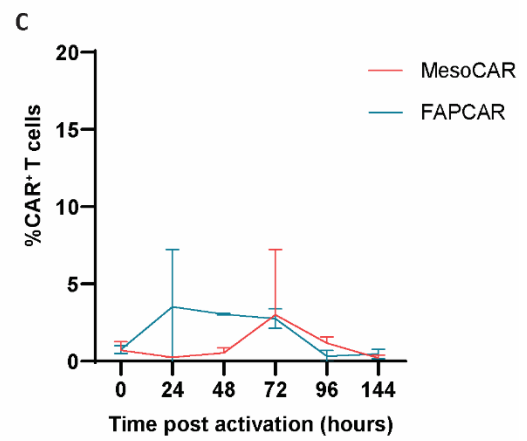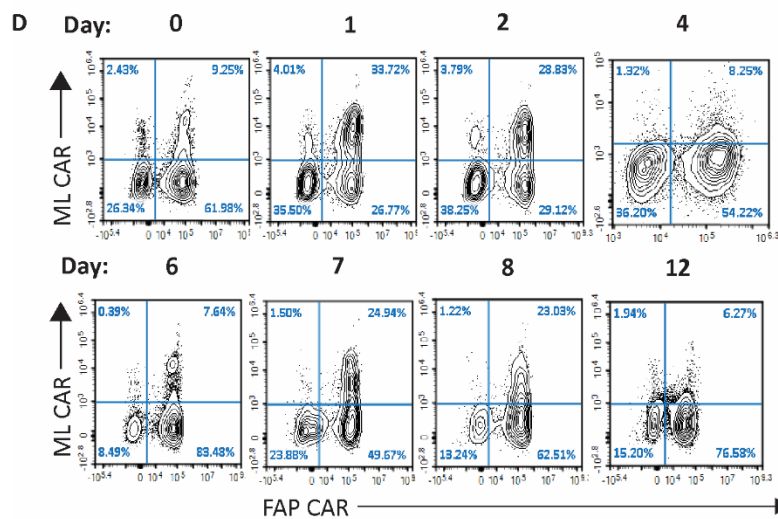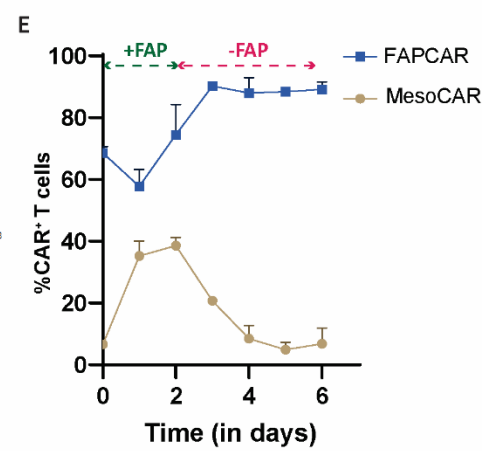

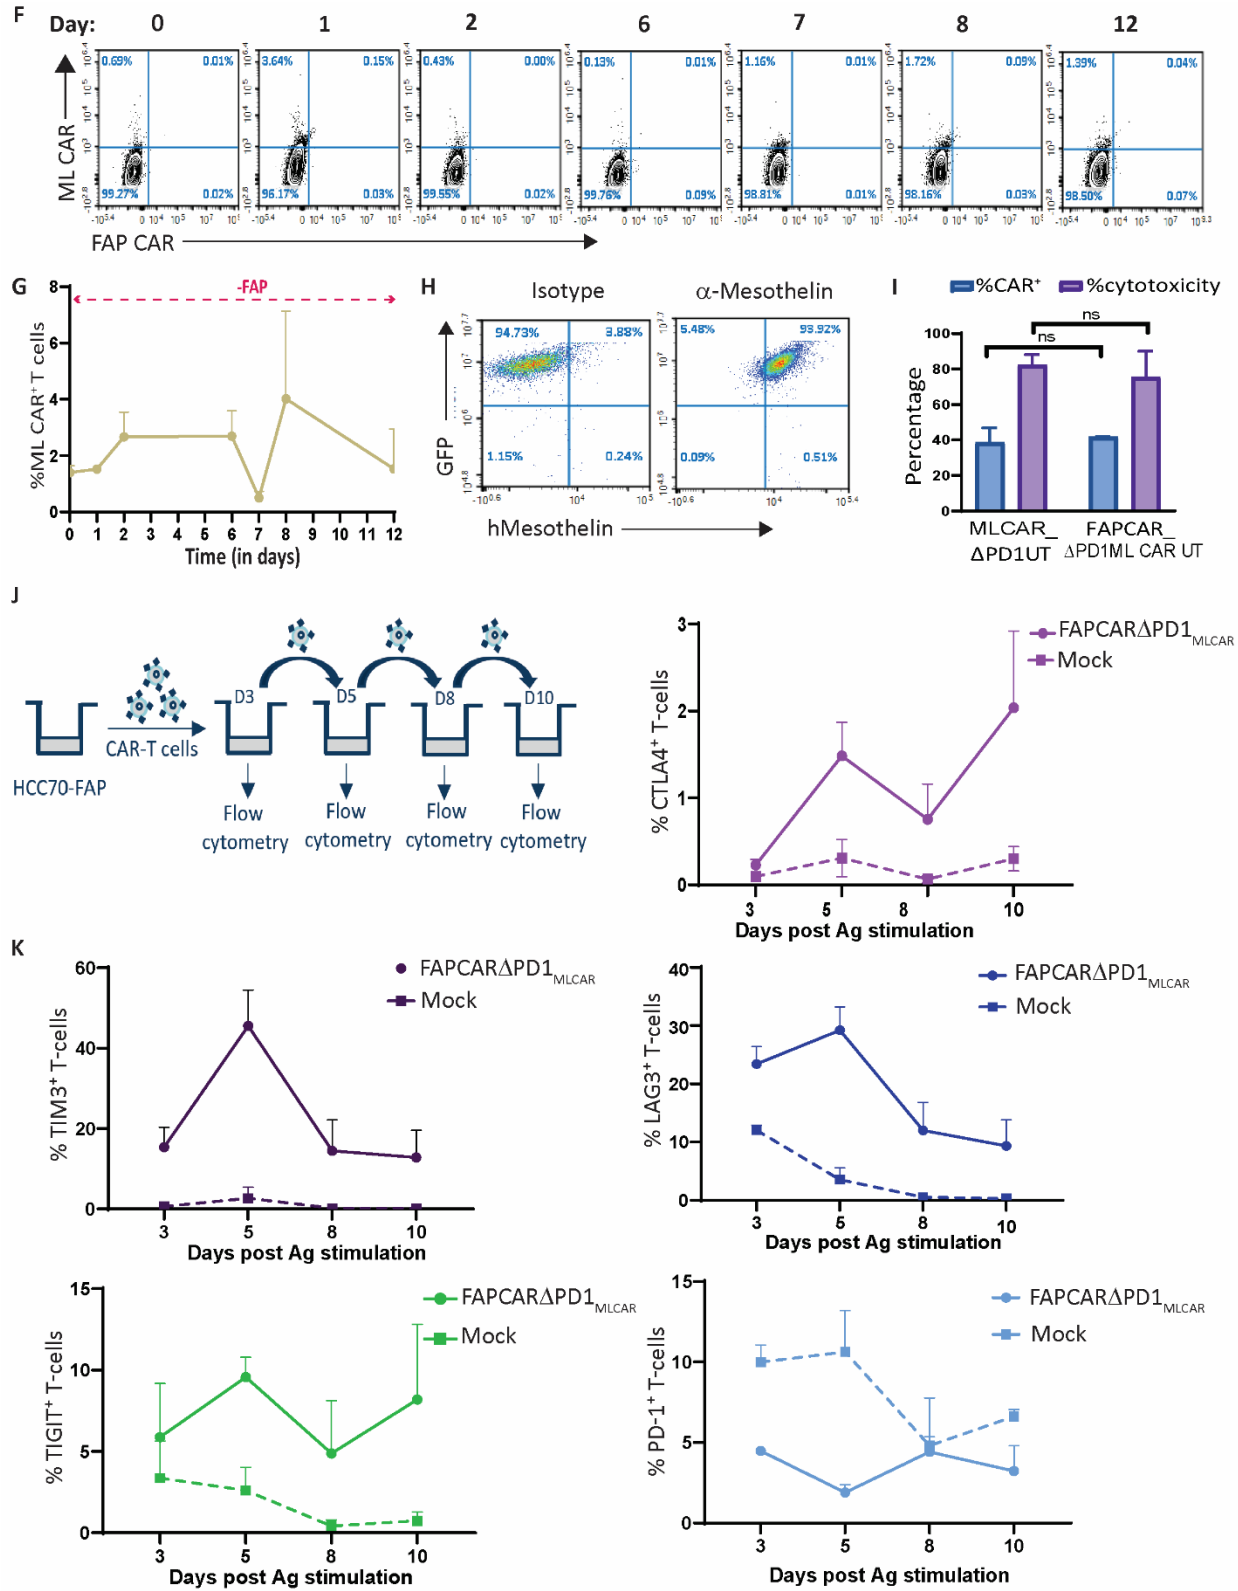

**Figure S3. FAP CAR-mediated regulation of *PDCD1* integrated ML CAR expression and activity**



(A) Flow cytometry plots depicting kinetics of MLCAR surface expression on FAPCAR\_ΔPD1<sub>MLCAR</sub> UT cells following FAP CAR activation with FAP protein incubation. (B) Flow cytometry plots depicting kinetics of MLCAR surface expression on control ΔPD1<sub>MLCAR</sub> UT cells following FAP protein incubation. (C) Graph depicting kinetics of FAP CAR and MLCAR expression following FAP protein incubation of control ΔPD1<sub>MLCAR</sub> UT-cells. Each data point represents mean ± SD, n=3 donors. (D) Representative flow cytometry plots time course of FAP CAR and MLCAR expression upon FAP CAR stimulation and withdrawal of stimulus (FAP protein) from FAPCAR\_ΔPD1<sub>MLCAR</sub> UT-cells. (E) Graph representing time course of FAP CAR and MLCAR expression upon FAP CAR stimulation and withdrawal of stimulus (FAP protein) from FAPCAR\_ΔPD1<sub>MLCAR</sub> UT-cells. Each data point represents mean ± SD, n=2 donors. (F) Flow cytometry plots representing time course of FAP CAR and MLCAR expression upon stimulation and withdrawal of stimulus (FAP protein) from control ΔPD1<sub>MLCAR</sub> UT-cells. (G) Graph representing time course of MLCAR expression without FAP CAR stimulation (with FAP protein) of FAPCAR\_ΔPD1<sub>MLCAR</sub> UT-cells. Each data point represents mean ± SD, n=3 donors. (H) Analysis of ML expression on surface of NCI-H226-GFP-Luc tumor cells, as determined by flow cytometry. (I) Bar graph representing percentage MLCAR positive cells in two engineered UT cell populations-MLCAR\_ΔPD1 and FAPCAR\_ΔPD1<sub>MLCAR</sub> cells 48 h post FAP-activation, with their corresponding cytotoxic activity against ML<sup>+</sup>FAP<sup>-</sup> NCI-H226-LUC tumor cells co-incubated for 24 h, with target cells at Effector: Target ratio=1:1. Bars show the means ± SD, n=2; P-values determined by Student t test (two-tailed, unpaired), ns-not significant. (J). Schematic of serial stimulation of FAPCARΔPD1<sub>MLCAR</sub> UT-cells with FAP-transduced ML<sup>+</sup> HCC70 cells over a period of 10 days. (K) Graph depicting kinetics of exhaustion marker expression as measured by flow cytometry analysis on Mock transduced or FAPCARΔPD1<sub>MLCAR</sub> UT-cells, serially stimulated with FAP+ML<sup>+</sup> HCC70 cells over 10 days. Each data point represents mean ± SD, n=2 donors.

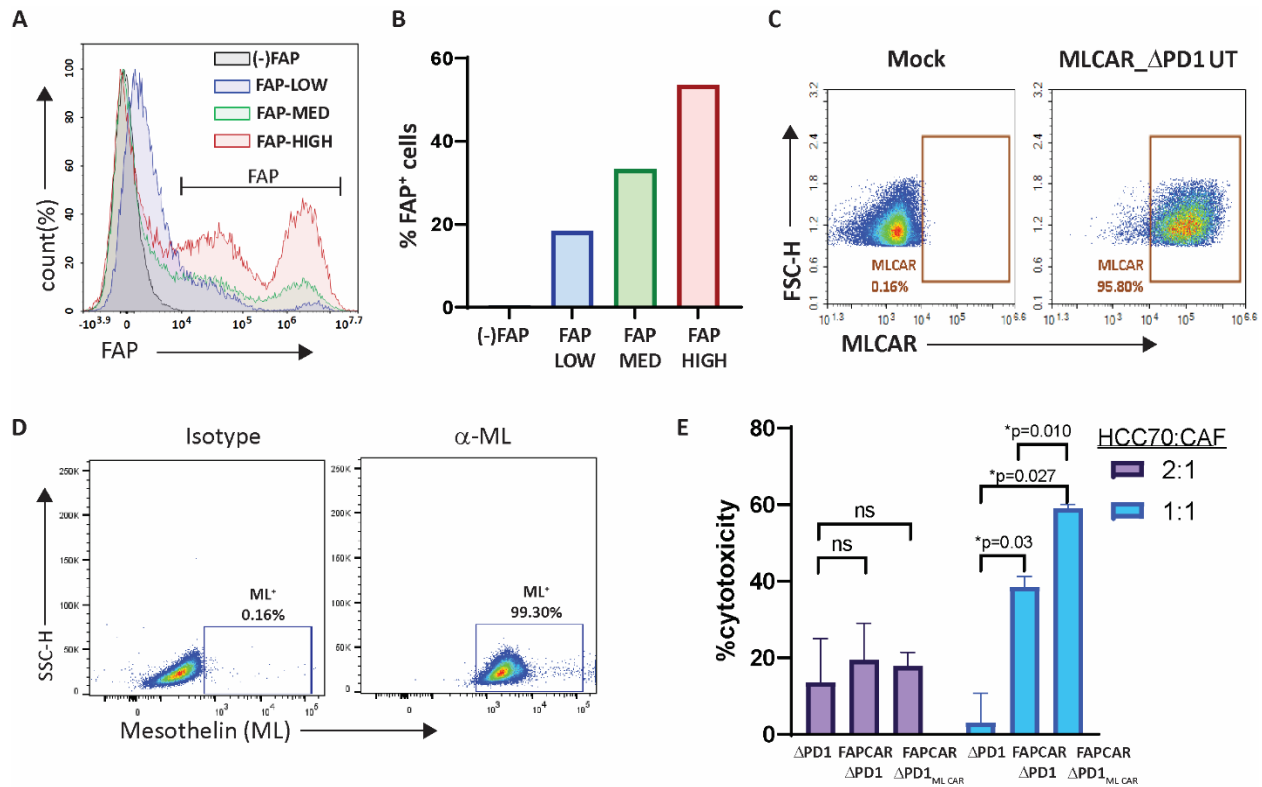

**Figure S4. FAPCAR\_ΔPD1<sub>ML\_CAR</sub> UT-cells efficiently target FAP<sup>+</sup>ML<sup>+</sup>tumors in a FAP CAR activation-dependent manner**

(A) Flow cytometry histogram depicting expression of FAP in (-)FAP, FAP(LOW), FAP(MED) and FAP(HIGH) NCI-H226-Luc transduced cells. (B) Graph depicting percentage of FAP<sup>+</sup> cells in the different NCI-H226-Luc cells, as indicated. (C) Flow cytometry plot depicting ML CAR expression in mock transduced and MLCAR\_ΔPD1 UT-cells. (D) Analysis of ML expression on HCC70-Nanoluc tumor cells, as determined by flow cytometry. (E) Bar graph representing percentage HCC70-GFP tumor cell lysis post cytotoxicity assay of indicated engineered T-cells against HCC70 and CAF spheroid co-cultures at ratios of 2:1 and 1:1 and at Effector: Target ratio of 5:1. Data representative of n=2 independent experiments, 2 donors per experiment, 3 technical replicates per donor per experiment. Bars show the means ± SD; P- values determined by Student t test (two-tailed, unpaired). ns-not significant, \*p≤0.05.

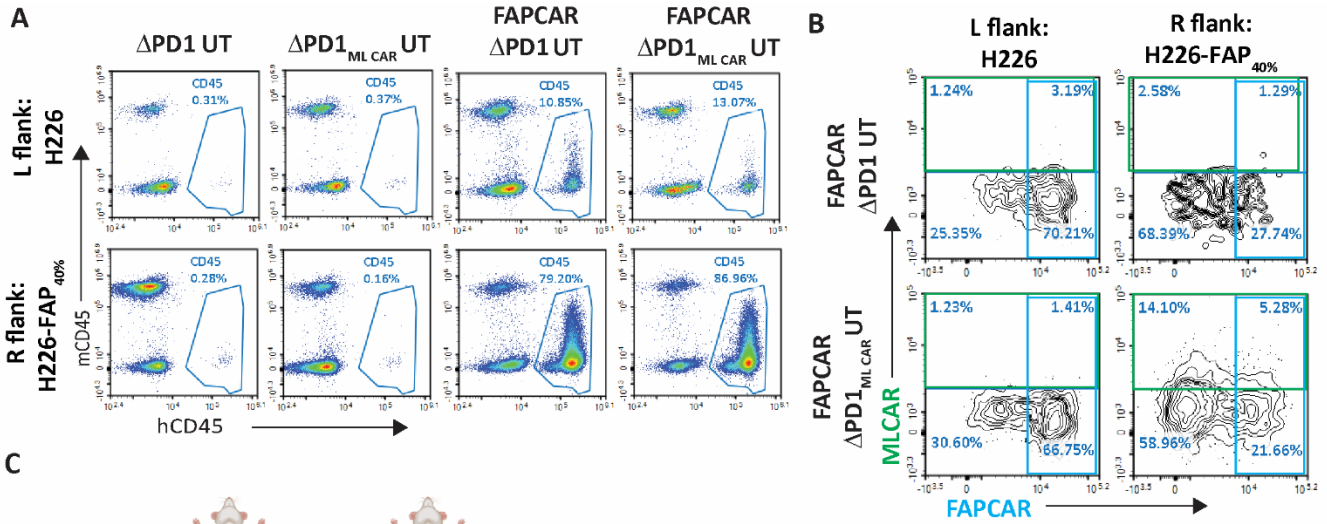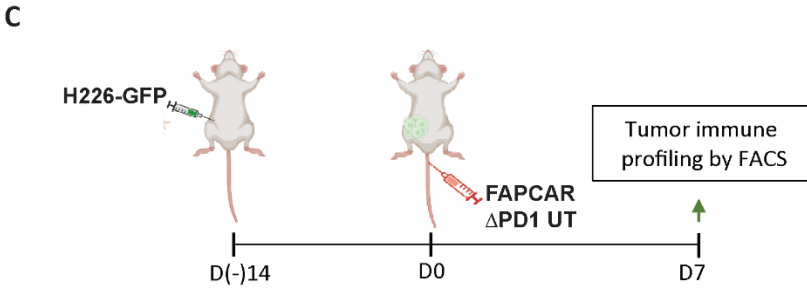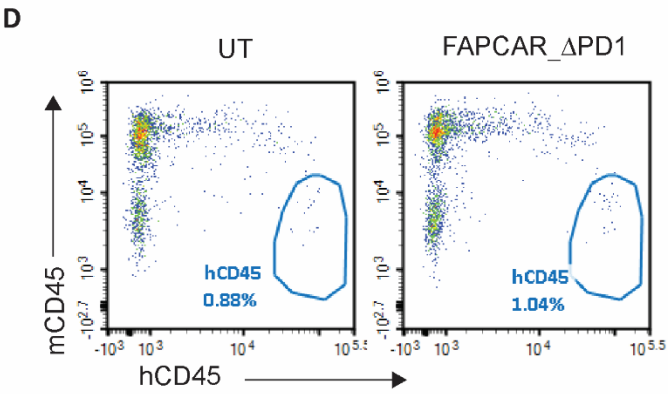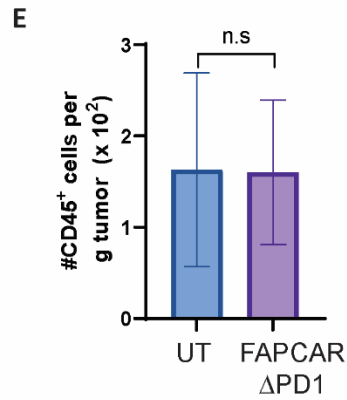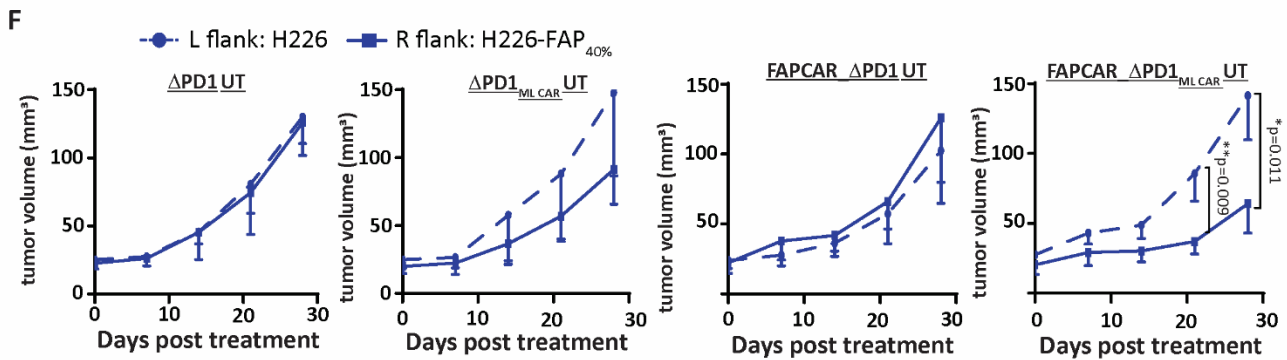

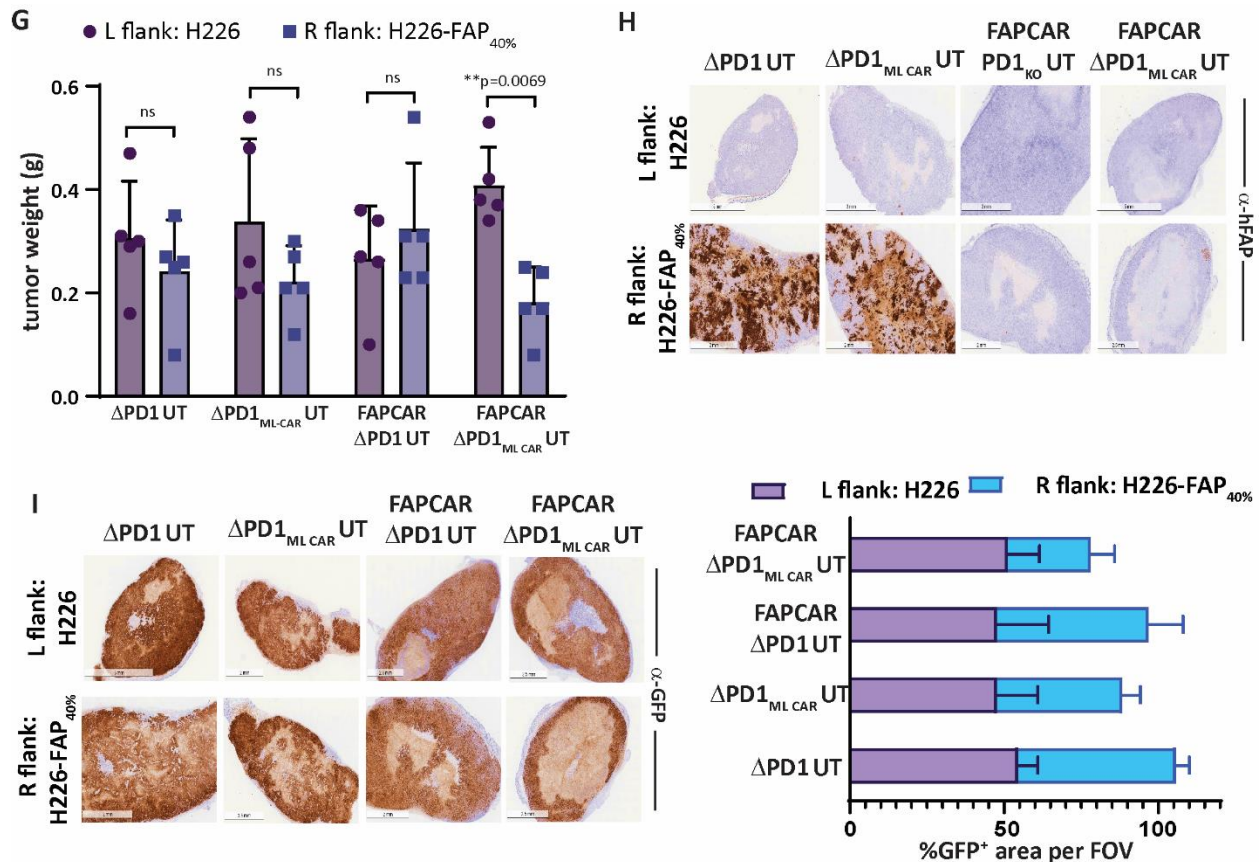

**Figure S5. FAPCAR\_ΔPD1<sub>ML CAR</sub> UT-cells display enhanced anti-tumor activity with no detectable ‘off tumor’ toxicity.**

(A) Flow cytometry plot of human CD45<sup>+</sup> UCAR T-cell population in subcutaneous tumors harvested from mice treated as indicated. (B) Flow cytometry plot of percentage of FAP CAR<sup>+</sup> and ML CAR<sup>+</sup> among viable human CD45<sup>+</sup> UT cells in subcutaneous tumors harvested from mice treated as indicated. (C) Schematic of UCAR T-cell treatment and analysis of subcutaneous H226 tumor implanted in NSG mice. (D) Flow cytometry plot of human CD45<sup>+</sup> UCAR T-cell population in subcutaneous H226 tumors harvested from mice treated as indicated. (E) Bar graph representing quantitation of total number of hCD45<sup>+</sup> cells per gram tumors from mice treated with indicated UT-cells 7 days post administration, as determined by flow cytometry. P-values determined by Student t test (two-tailed, paired), n=2 mice per cohort. ns-not significant. (F) Graphs indicating comparative growth kinetics of left flank H226 tumors and right flank H226-FAP<sub>40%</sub> tumors, treated with indicated UT cells. Each point represent mean ± s.d, n= 3 mice per cohort; ; P-values determined by Student t test (two-tailed, paired). \*p≤0.05, \*\*p≤0.01. (G) Graph depicting weight

in grams of tumors excised from different cohorts at study endpoint, as indicated. Each bar represent mean  $\pm$  s.d, n= 3-5 mice per cohort; ; P-values determined by Student *t* test (two-tailed, paired), ns-not significant, \*\* $p \leq 0.01$ . **(H)** Representative images of immunohistochemical analysis for FAP expression on excised tumors treated as indicated. **(I)** Representative images of immunohistochemical analysis for GFP expression on excised tumors treated as indicated. On the right, stacked bar graph representing quantitation of percentage GFP<sup>+</sup> area corresponding to IHC samples in the left panel. Each bar represents mean  $\pm$  s.d of at least four field of views per tumor, n=3-5 mice per cohort.

**Table S1.** Percentage FAP<sup>+</sup> area in tissue microarray of tumor biopsy tissues, as determined by immunohistochemistry.

| <b>Tumor tissue</b> | <b>%FAP<sup>+</sup> stained area</b> |
|---------------------|--------------------------------------|
| Descending Colon    | 70.0                                 |
| Skin                | 45.0                                 |
| Lung                | 37.0                                 |
| Esophagus           | 75.0                                 |
| Uterine Cervix      | 75.0                                 |
| Stomach             | 73.0                                 |
| Rectum              | 55.0                                 |
| Endometrium         | 47.80                                |
| Breast Ductal       | 55.0                                 |
| Osteocarcinoma      | 85.0                                 |
| Thyroid Papillary   | 76.0                                 |

**Table S2.** Percentage FAP<sup>+</sup> area in tissue microarray of normal tissues from three healthy donors, as determined by immunohistochemistry.

| <b>Healthy Tissue</b>    | <b>% FAP<sup>+</sup> stained area</b> |                |                |
|--------------------------|---------------------------------------|----------------|----------------|
|                          | <b>Donor-1</b>                        | <b>Donor-2</b> | <b>Donor-3</b> |
| Skin                     | 3.0829                                | 2.9635         | 0.9712         |
| Breast                   | 0.6396                                | 2.4834         | 1.2601         |
| Spleen                   | 0.3186                                | 0.3245         | 0.2801         |
| Skeletal muscle normal   | 12.4789                               | 3.2692         | 0.2935         |
| Lung normal              | 19.3374                               | 0.2515         | 1.1241         |
| Liver normal             | 2.3799                                | 3.49           | 0.8303         |
| Stomach, body normal     | 11.7077                               | 13.0123        | 14.6087        |
| Colon normal             | 0.376                                 | 1.0094         | 0.3449         |
| Kidney, cortex           | 0.9469                                | 0.6967         | 0.2909         |
| Kidney, medulla          | 3.2297                                | 0.4884         | 0.3914         |
| Prostate normal          | 0.1076                                | 1.3936         | 0.5353         |
| Placenta normal          | 20.2895                               | 11.3175        | 15.6667        |
| Brain, white matter      | 0.2122                                | 0.1951         | 0.0159         |
| Brain, gray matter       | 0.064                                 | 0.1807         | 0.0332         |
| Cerebellum               | 0.09                                  | 0.1053         | 0.7169         |
| Lymph node               | 0.2464                                | 0.285          | 0.7432         |
| Heart                    | 2.0957                                | 1.2655         | 3.2937         |
| Salivary gland           | 1.0228                                | 0.2064         | 0.8257         |
| Pancreas                 | 1.3192                                | 1.8801         | 2.3008         |
| Tonsil                   | 0.0377                                | 0.0704         | 0.0571         |
| Esophagus                | 4.4227                                | 5.7468         | 1.5048         |
| Small intestine, jejunum | 0.3714                                | 0.3292         | 0.2483         |
| Rectum                   | 0.1932                                | 1.42           | 0.6689         |

|                 |        |         |         |
|-----------------|--------|---------|---------|
| Urinary bladder | 1.8392 | 1.488   | 2.0712  |
| Testis          | 0.6519 | 3.2515  | 7.5429  |
| Endometrium     | 8.0456 | 5.8058  | 1.6278  |
| Ovary           | 0.2577 | 0.1324  | 0.3867  |
| Adrenal gland   | 5.6342 | 11.4769 | 13.5404 |
| Thyroid         | 2.9673 | 4.8813  | 12.22   |
| Thymus          | 0.9455 | 1.078   | 3.7831  |
